# Supplementary material
Source: publisher site journal article supplement (https://www.dovepress.com/get_supplementary_file.php?f=320091.docx)
Supplement: Supplementary file 1 [file get_supplementary_file.php]

**Supplementary Table S1.** Participating centers

| No. | Institute |
| --- | --- |
| 1 (lead center) | Shanghai Mental Health Center Affiliated to Shanghai Jiaotong University |
| 2 | Peking University sixth hospital |
| 3 | Harbin First Special Hospital |
| 4 | First Affiliated Hospital of Xi'an Jiaotong University |
| 5 | Wuhan Mental Health Center |
| 6 | Hangzhou Seventh People's Hospital |
| 7 | Shandong Mental Health Center |
| 8 | Shenzhen Kangning Hospital |
